# Supplementary material for: Induced Pluripotent Stem Cells Reduce Progression of Experimental Chronic Kidney Disease but Develop Wilms’ Tumors
Source: Hindawi journal article supplement (doi:10.1155/2017/7428316), 2017-01-01
Supplement: f2 [file 7428316.f2.pdf]

**Table S1:** The Sequences for the Primers of Reverse Transcription-Polymerase Chain Reaction

| <b>Gene name</b> | <b>Primer Sequence (5' to 3')</b> |
|------------------|-----------------------------------|
| Oct-4_F          | ATAGATCTCATGGCTGGACACCTGGCT       |
| Oct-4_R          | AGTCTAGACTCAGTTTGAATGCATGGGAGATGT |
| Nanog_F          | CATCCTGAACCTCAGCTACAAACA          |
| Nanog_R          | TTGCTATTCTTCGGCCAGTTGT            |
| Sox-17_F         | TTTCATGGTGTGGGCTAAGGA             |
| Sox-17_R         | GCGCCTTCCACGACTTGC                |
| ActB_F           | AAGGCCAACCGTGAAAGATG              |
| ActB_R           | GTGGTACGACCAGAGGCATACA            |
